# Supplementary figures and images for: Tunable valence state and scintillation performance of dense Ce3+-doped borosilicate glasses prepared in ambient atmosphere
Source: Royal Society of Chemistry journal article supplement (doi:10.1039/d4tc01552e), 2024-01-01

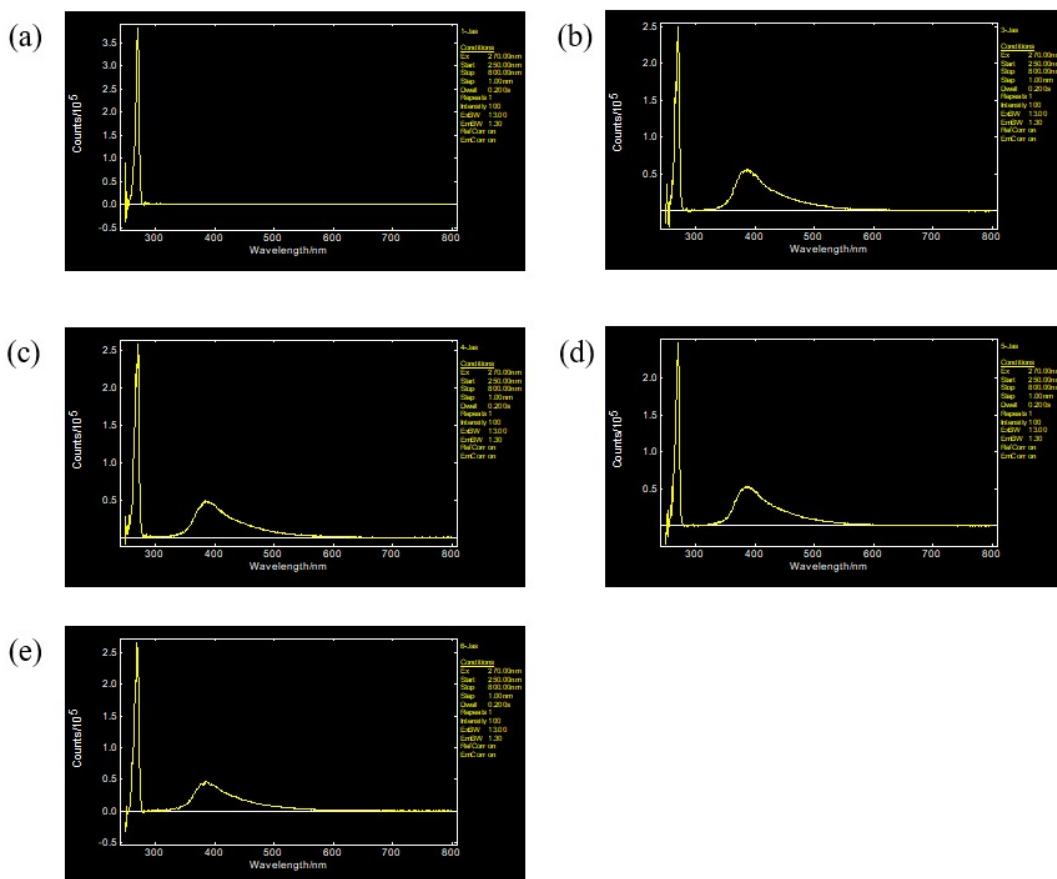

Figure S1. The PL QYs of GABS<sub>x</sub> glasses, (a) x=0, (b) x=0.25, (c) x=0.5, (d) x=1.0, (e) x=1.5.

Supplement: d4tc01552e1.pdf [file d4tc01552e1.pdf]
